# Supplementary material
Source: PubMed Central journal article supplement (PMC8971387)

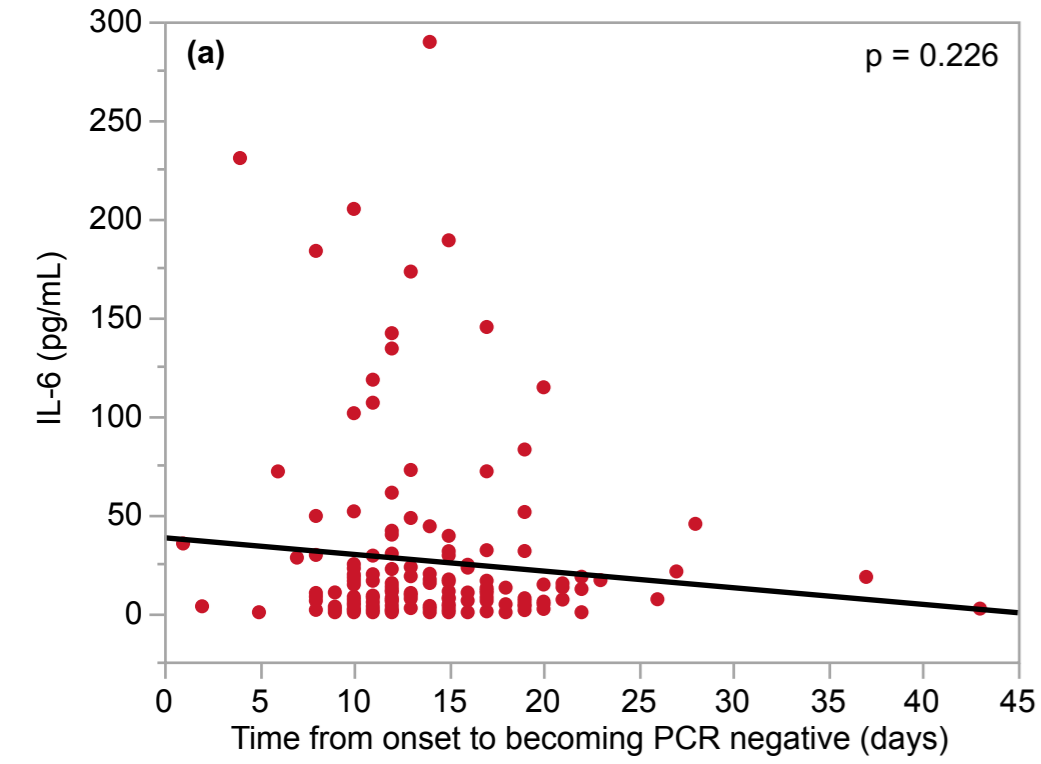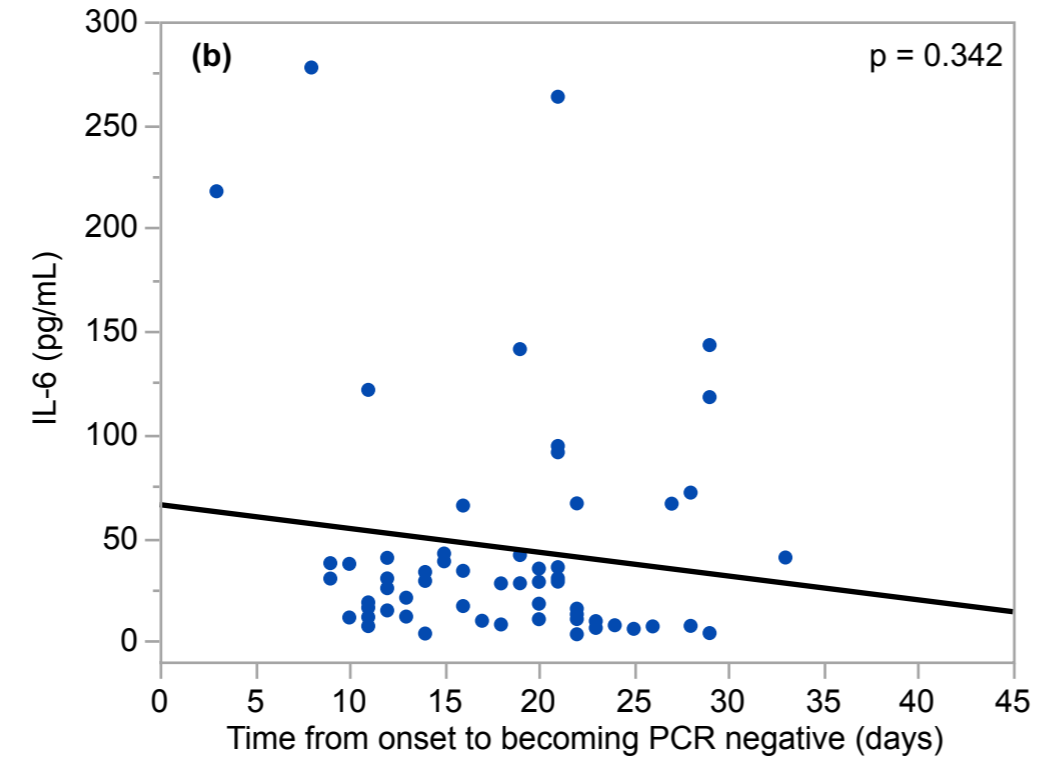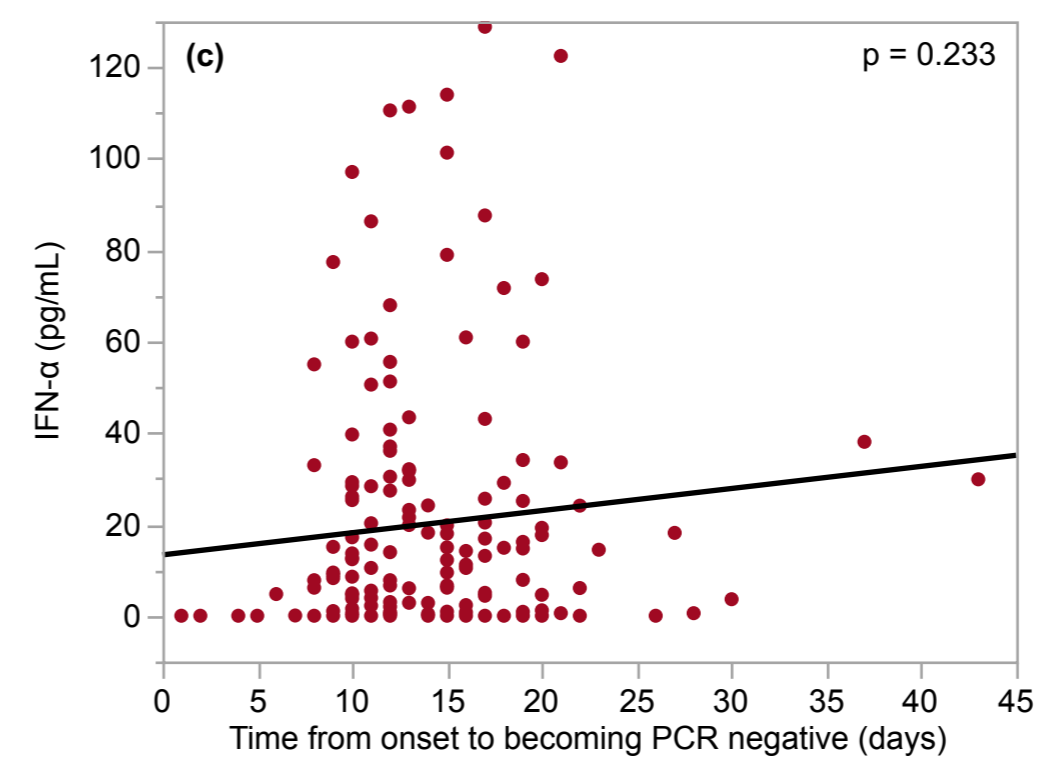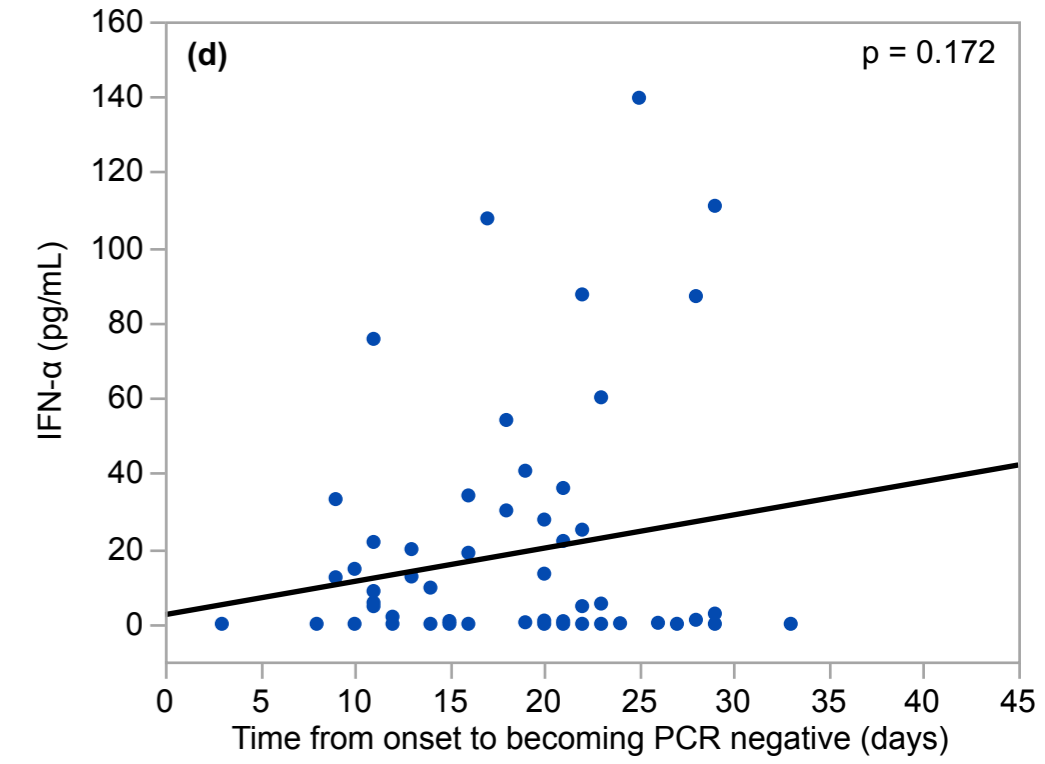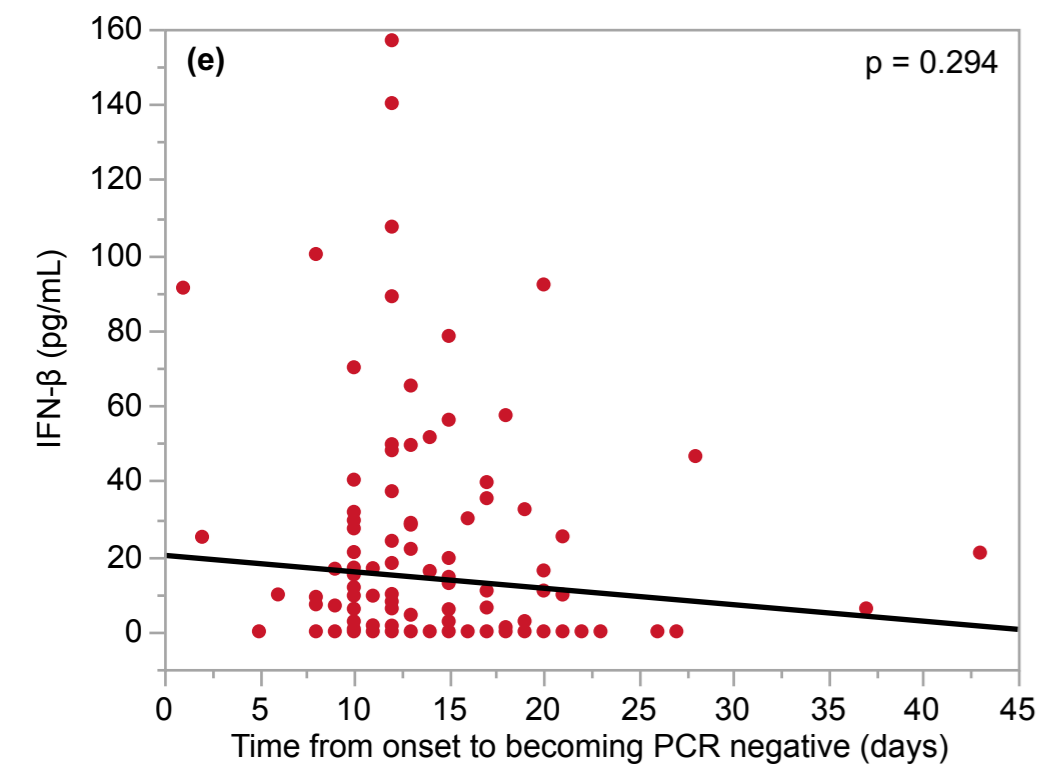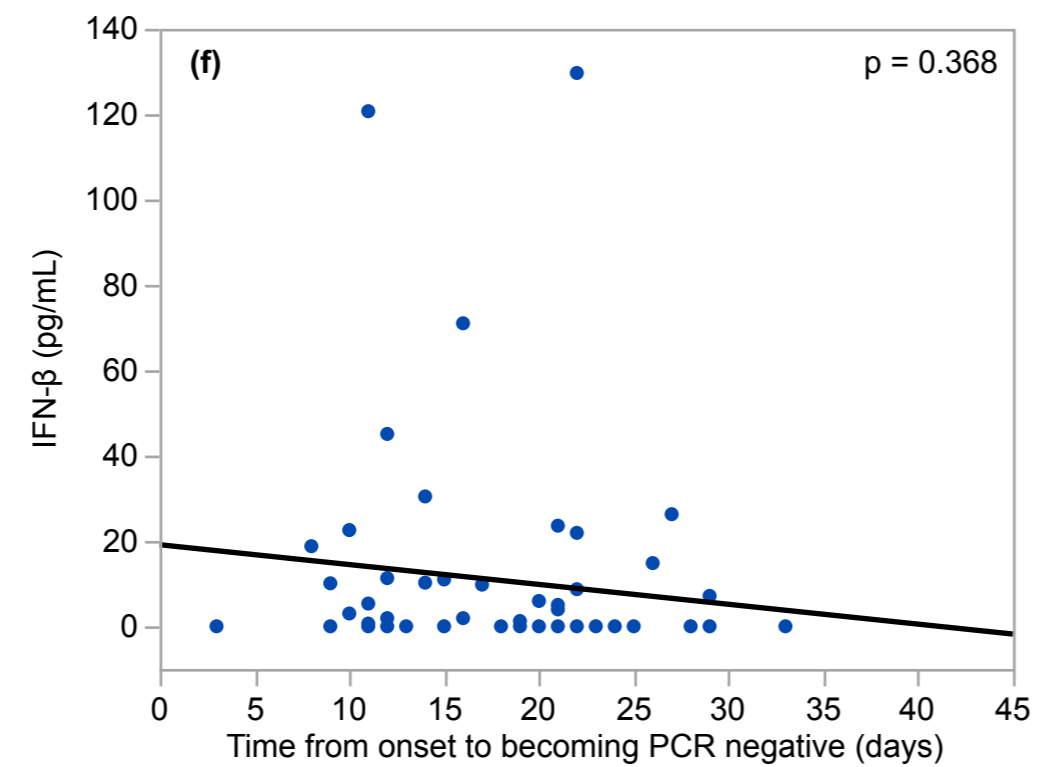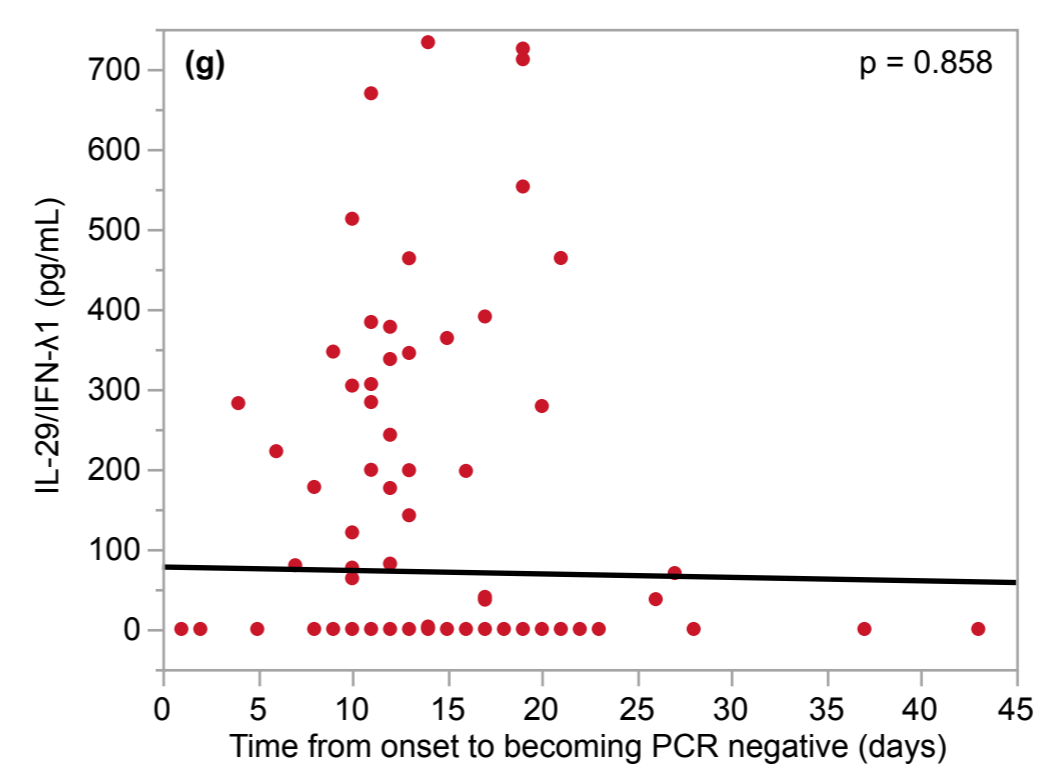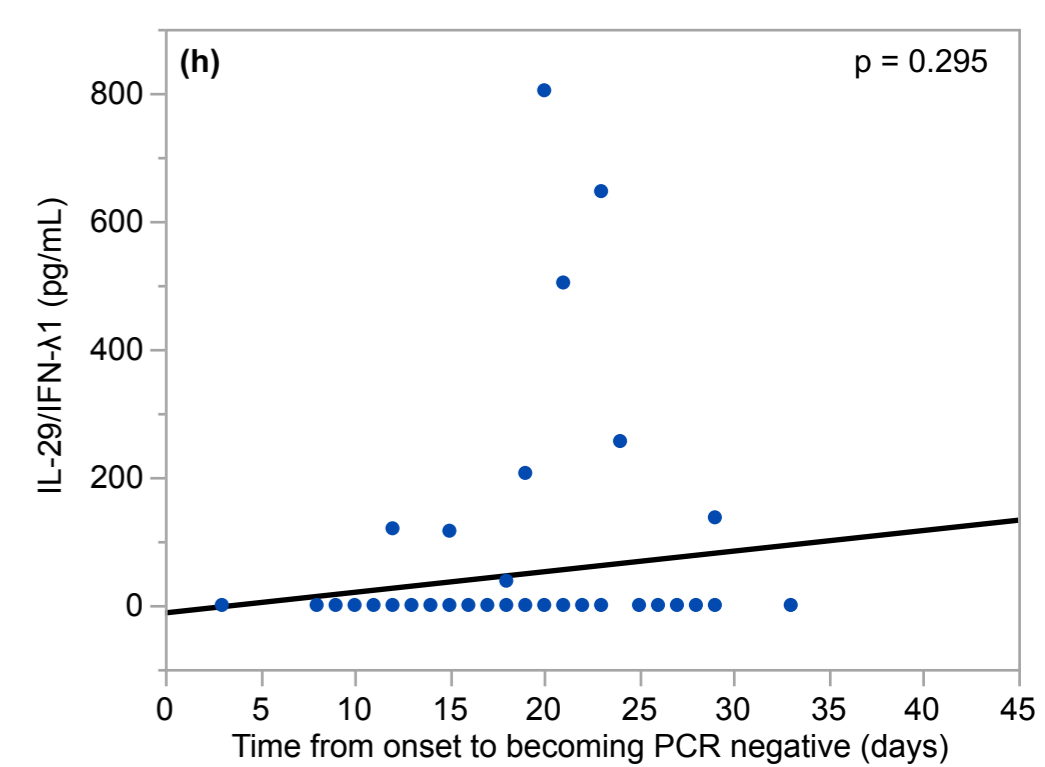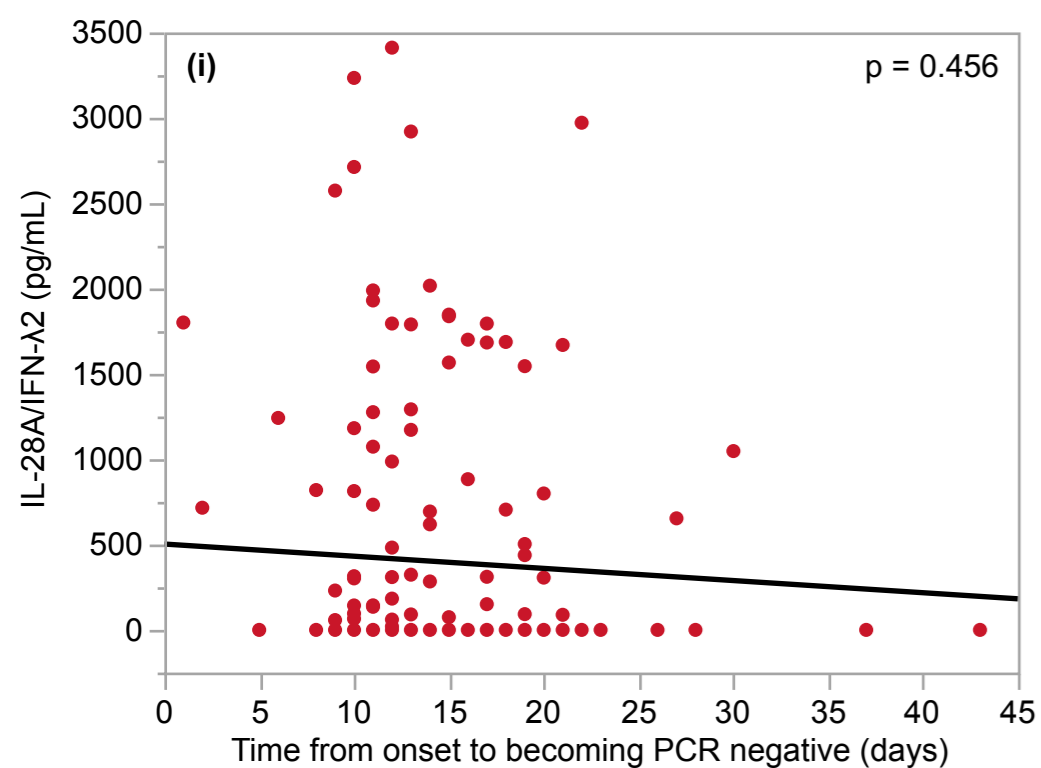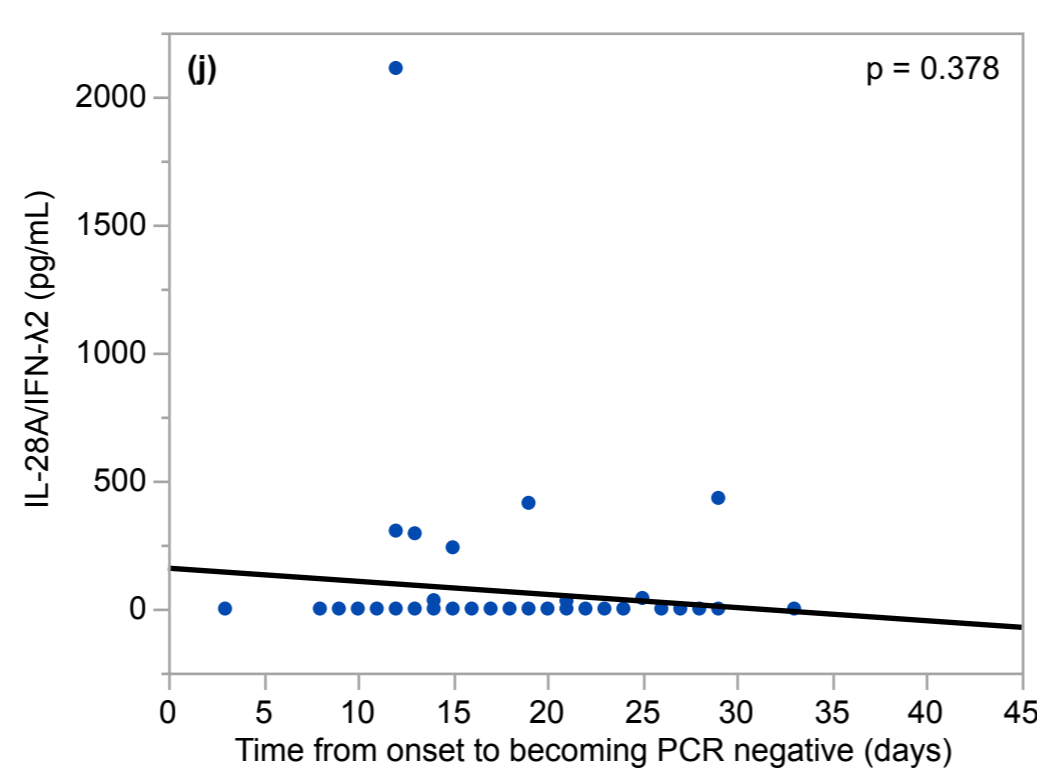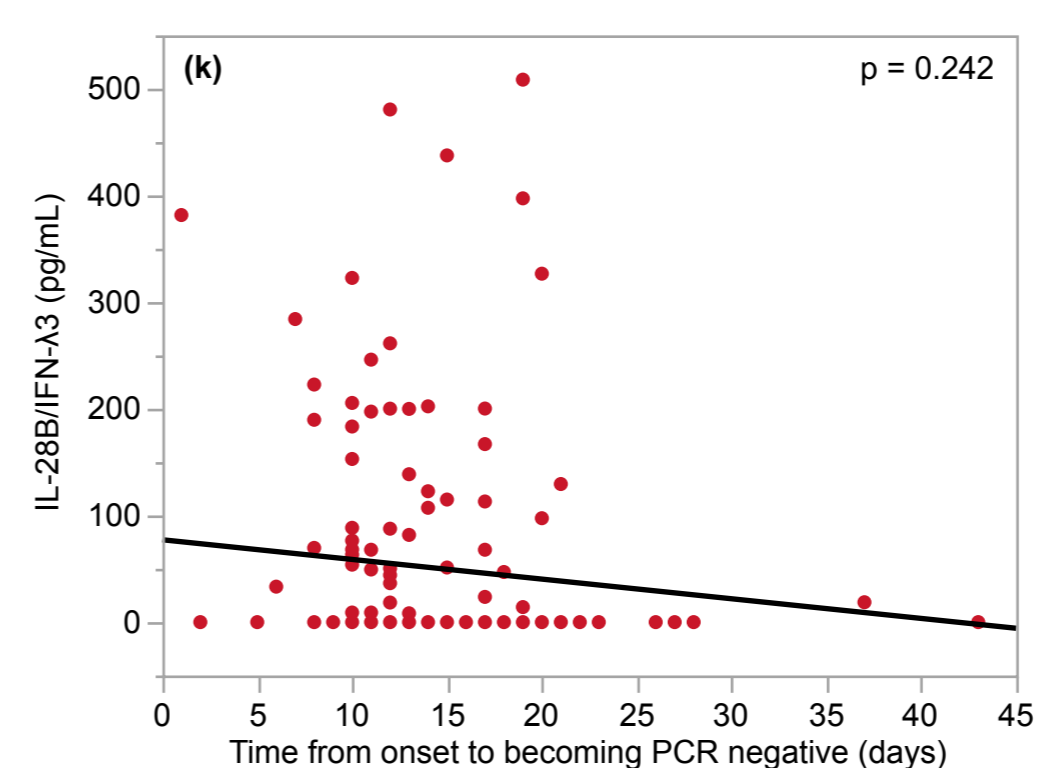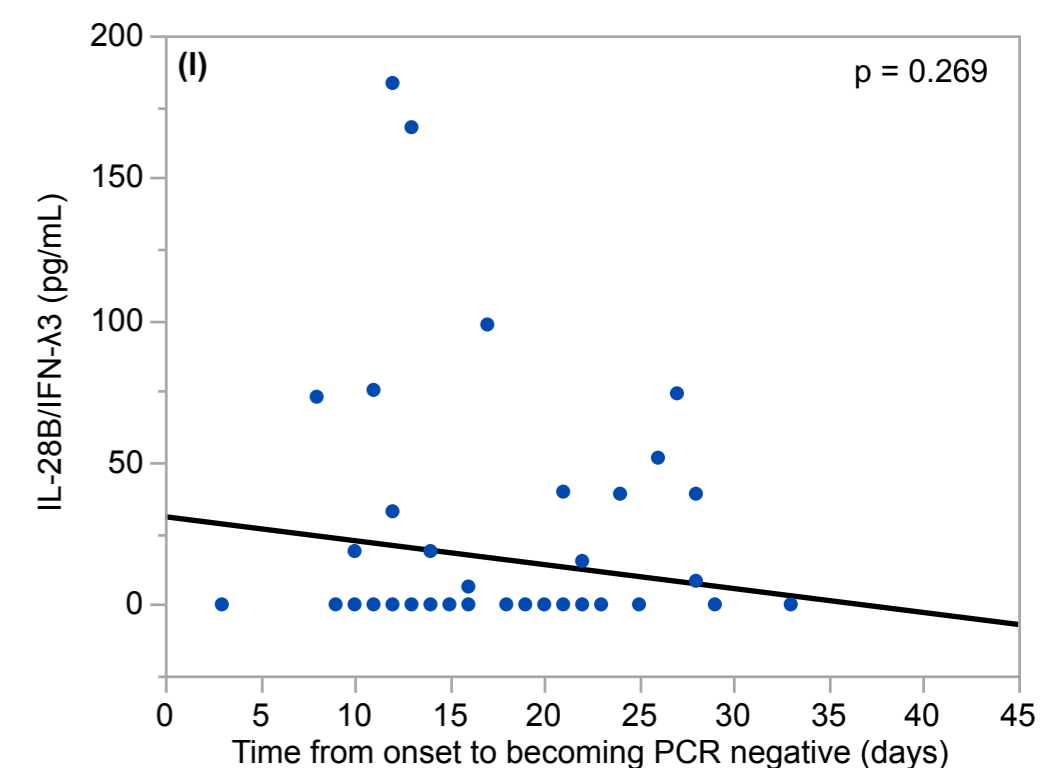

Supplement: 41598_2022_9544_MOESM6_ESM.pdf [file 41598_2022_9544_MOESM6_ESM.pdf]
